# Supplementary material
Source: Elsevier journal article supplement (https://www.sciencedirect.com/science/article/pii/S1575181318302377)
Supplement: mmc1 [file S1575181318302377:mmc1.docx]

**ANEXO 1:**

**Caso 4: Farmacología del Dolor, digestiva y endocrina**

Mujer de 65 años con diagnóstico de artritis reumatoide, desde hace 2 años. En forma habitual para controlar el dolor utiliza ketorolaco y prednisolona, en caso de emergencia agrega tramadol. Además toma 1 comprimido diario de aspirina de niño, aunque a veces no tiene aspirina de niño y toma 1 comprimido de aspirina de adulto. Este tratamiento le ha generado algunos inconvenientes y ha tenido fuerte dolores abdominales, sin embargo, no le ha dado importancia. Acude a su control de enfermería bastante preocupada porque ha estado con bastante tos y con disnea progresiva de una semana de evolución. Se le realizan varios análisis que confirman que la paciente está pasando por un cuadro de infección pulmonar, además se confirma una alta colonización de *H. Pylori*.
