# Supplementary material
Source: Elsevier journal article supplement (https://www.sciencedirect.com/science/article/pii/S1575181318302377)
Supplement: mmc2 [file S1575181318302377:mmc2.docx]

**ANEXO 2:**

**Caso 1.**

Paciente de 62 años, sin alergias medicamentosas ingresa a urgencias por fuerte dolor de cabeza y sensación de mareo. Se midió su presión arterial y se encontró el siguiente valor 150/80 mmHg.

Antecedentes: Hipertensión arterial, cardiopatía isquémica con IAM hace 5 años. Diabético tipo 2 diagnosticada hace más de 20 años, tratada con insulina NPH 24-0-22 UI.

Su tratamiento habitual es: atenolol, Enalapril, hidroclorotiazida y ácido acetilsalicílico 100mg día.

1. **¿Cuál es la estrategia a seguir frente a una emergencia hipertensiva?**
2. **¿Por qué en su tratamiento habitual se utiliza una mezcla de antihipertensivos? ¿cuál es la función de cada uno de ellos en el descenso de la presión arterial? Explique utilizando el efecto de los antihipertensivos en esta ecuación.PA=GC*RTP.**
3. **¿Por qué esta paciente está utilizando ácido acetilsalicílico?**
4. **Explique la razón médica por la cual esta paciente llegó al uso de insulina, sin ser diabética tipo 1.**
5. **¿Qué características tiene la insulina NPH (acción intermedia)? ¿cuál es la forma correcta de administración?**
